# Supplementary material for: Age-related decline of the acute local inflammation response: a mitigating role for the adenosine A2A receptor
Source: publisher site journal article supplement (doi:10.18632/aging.101303), 2017-10-18
Supplement: Supplementary file [file aging-v9i10-101303-supplementary-material-SD1.pdf]

SUPPLEMENTARY MATERIAL

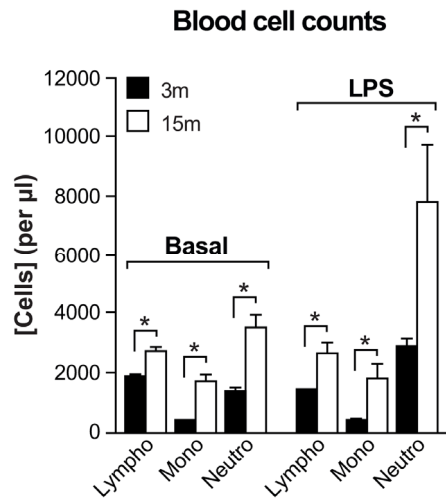

**Supplementary Figure S1. Blood cell counts.** Dorsal air pouches raised on wild-type (WT) mice aged 3 or 15 months were injected with either saline (Basal) or LPS for 4 h. Circulating lymphocytes, monocytes, and neutrophils were then enumerated as described in Methods. Results are expressed as mean ± SEM for *n* = 12 mice per group. \*Significantly different.

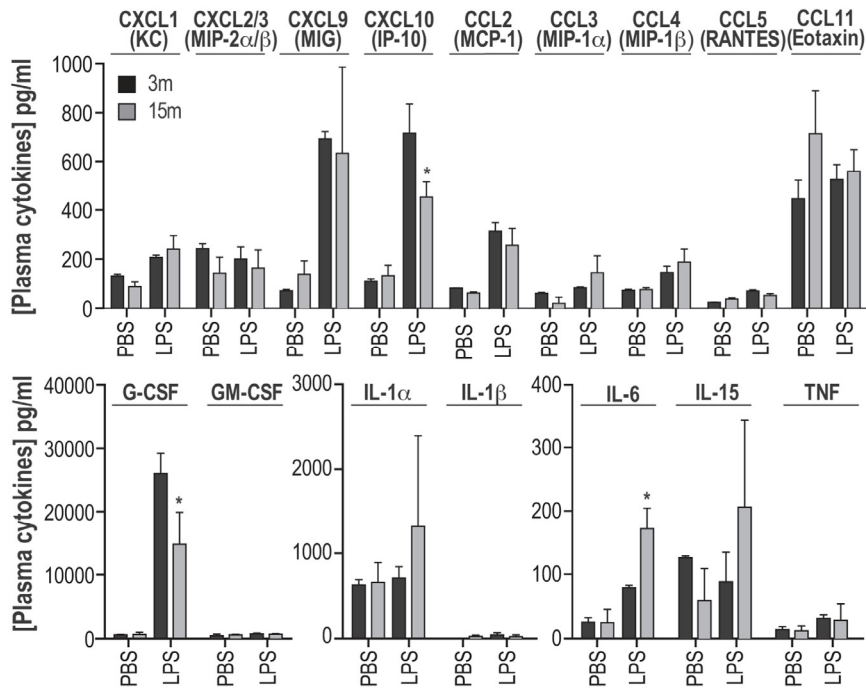

**Supplementary Figure S2. Plasma cytokine levels.** Dorsal air pouches raised on wild-type (WT) mice aged 3 or 15 months were injected with either saline (Basal) or LPS. Circulating plasma cytokine levels reached 4 h later were measured as described in Methods. Results are expressed as mean ± SEM for *n* = 12 mice per group. \*Significantly different.

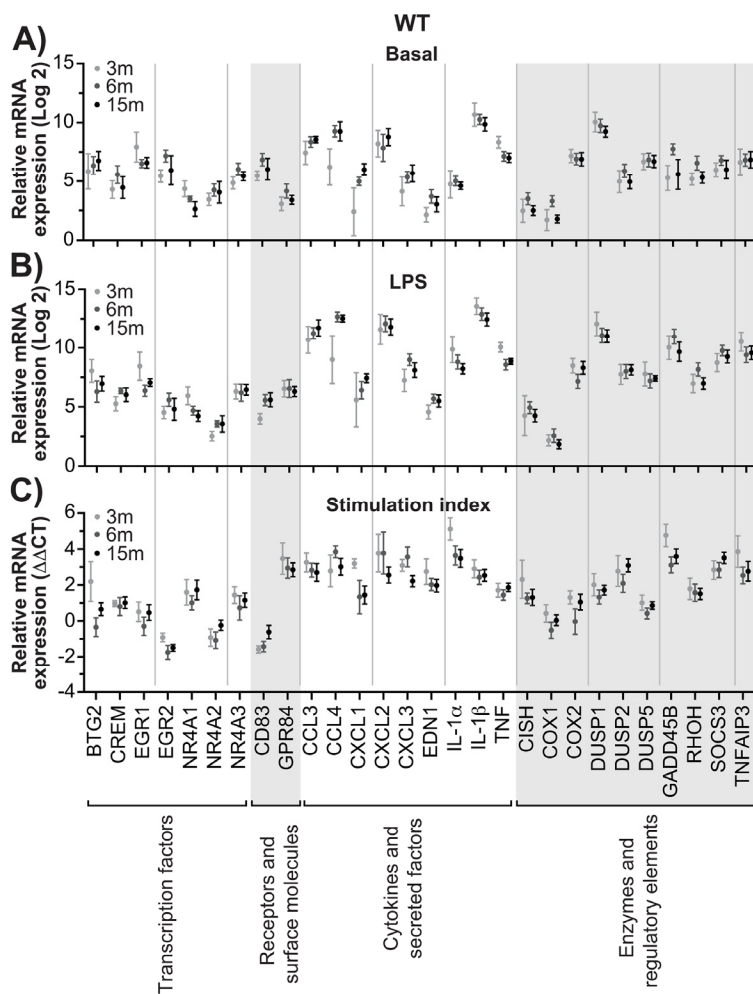

**Supplementary Figure S3. Gene expression in leukocytes recovered from dorsal air pouches raised on wild-type (WT) mice.** The abundance of mRNA transcript 4h after injection with saline (Basal) or LPS was measured for each gene as described in *Methods*. (A) Basal; (B) LPS; (C) Ratios of stimulated to basal expression levels (stimulation index). Values were calculated from the mean threshold cycle  $\pm$  SEM (cells from 8 mice were pooled for each value,  $n = 5$  experiments), relative to COX-1 in 3-month-old WT mice.

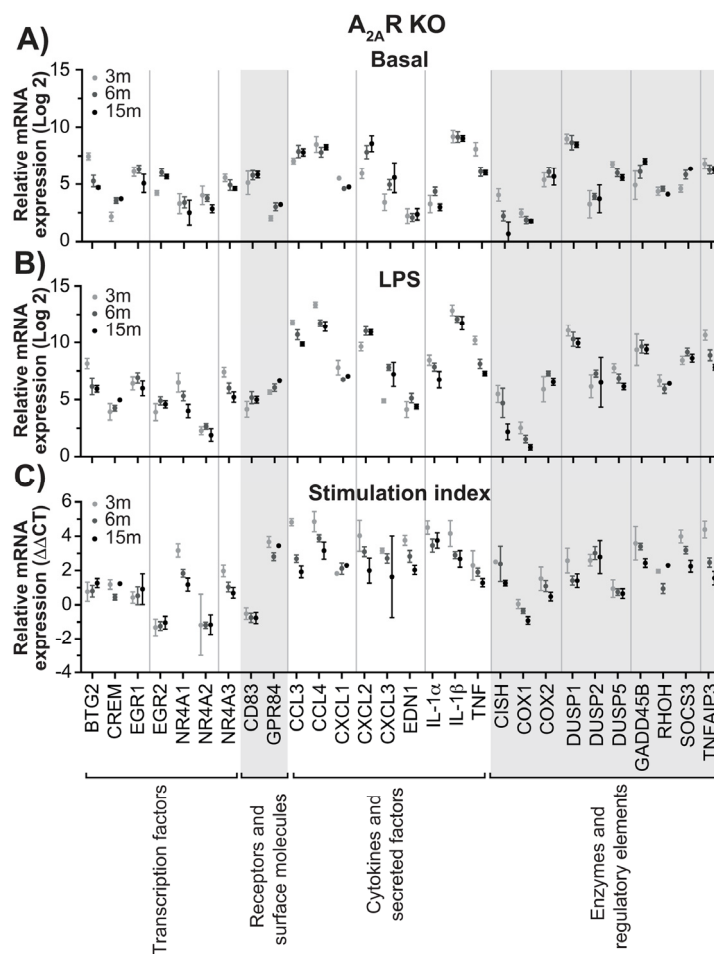

**Supplementary Figure S4. Gene expression in leukocytes recovered from dorsal air pouches raised on A<sub>2A</sub>R-knockout (KO) mice.** Please refer to the legend for Suppl. Fig. S3.
